# Supplementary material
Source: Springer Nature journal article supplement (https://www.springermedizin.de/resource/supplementary/12875_2013_957_MOESM1_ESM.pdf/9435352)
Supplement: MOESM1 [file 9435352]

Methods and resources from the  
PREVENT study

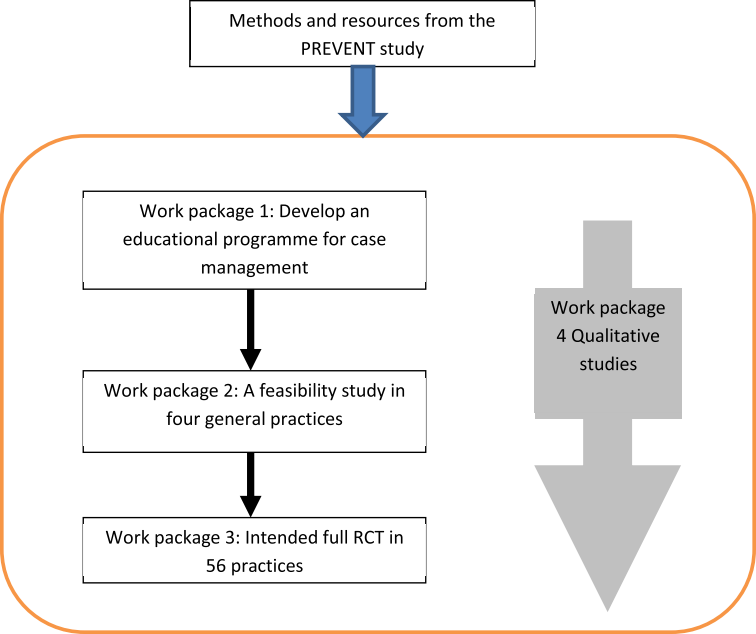

```
graph TD; A[Methods and resources from the PREVENT study] --> B[Work package 1: Develop an educational programme for case management]; B --> C[Work package 2: A feasibility study in four general practices]; C --> D[Work package 3: Intended full RCT in 56 practices]; E[Work package 4 Qualitative studies]
```

Work package 1: Develop an  
educational programme for case  
management

Work package 2: A feasibility study in  
four general practices

Work package 3: Intended full RCT in  
56 practices

Work package  
4 Qualitative  
studies
